# Supplementary material for: Ablation of Cbl-b and c-Cbl in dendritic cells causes spontaneous liver cirrhosis via altering multiple properties of CD103+ cDC1s
Source: PubMed Central journal article supplement (PMC8967913; doi:10.1038/s41420-022-00953-2), 2022-03-30

Figure 1E

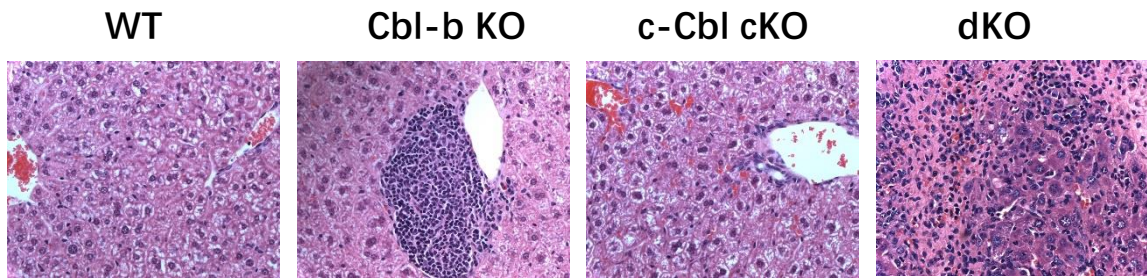

Figure 1F

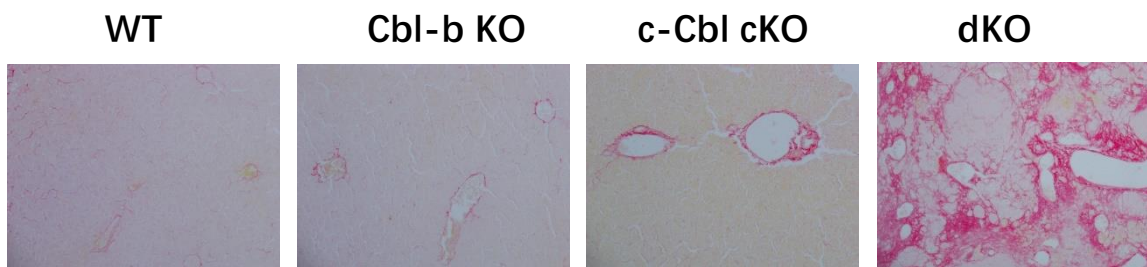

Figure 4I

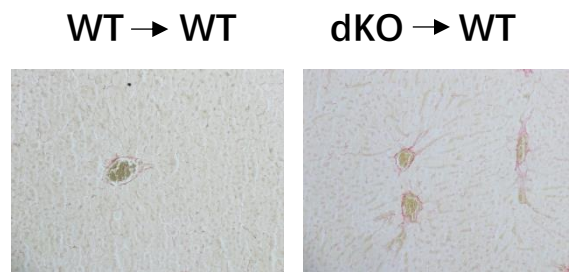

# Supplementary Figure1

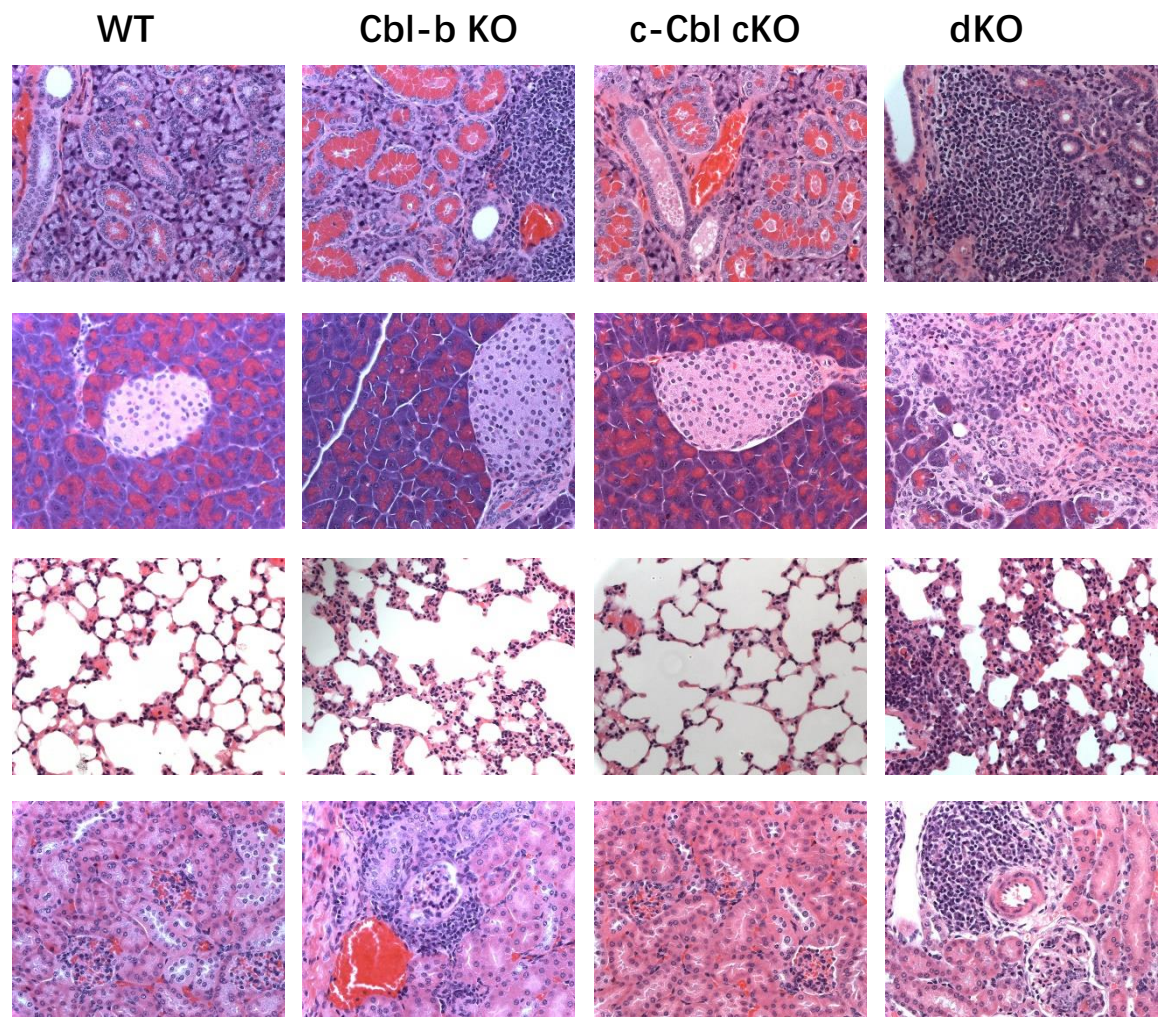

Supplement: 41420_2022_953_MOESM4_ESM.pdf [file 41420_2022_953_MOESM4_ESM.pdf]
